# Supplementary material for: Mass spectrometry-based de novo sequencing of the anti-FLAG-M2 antibody using multiple proteases and a dual fragmentation scheme
Source: bioRxiv or medRxiv preprint supplement (doi:10.1101/2021.01.07.425675), 2021-01-12
Supplement: Supplementary file [file media-1.pdf]

Supplementary Information to:

**Mass spectrometry-based *de novo* sequencing of the anti-FLAG-M2 antibody using multiple proteases and a dual fragmentation scheme**

**Authors:**

Weiwei Peng<sup>1#</sup>, Matti F. Pronker<sup>1#</sup>, Joost Snijder<sup>1\*</sup>

#equal contribution

\*corresponding author: [j.snijder@uu.nl](mailto:j.snijder@uu.nl)

**Affiliation:**

<sup>1</sup> Biomolecular Mass Spectrometry and Proteomics, Bijvoet Center for Biomolecular Research and Utrecht Institute of Pharmaceutical Sciences, Utrecht University, Padualaan 8, 3584 CH Utrecht, The Netherlands

**Keywords:**

mass spectrometry, antibody, *de novo* sequencing, EThcD, stepped HCD, Herceptin, FLAG tag, anti-FLAG-M2.

**anti-FLAG-M2 MS-based sequence (with L51I correction)**

>anti-FLAG-M2\_MS\_HeavyChain

QVQLQQSAAELARPGASVKMSCKASGYSFTTYTIHWVKQRPGGLEWIGYINPSSGYAAYNQNFKDETTLTADPSSS  
TAYMELNSLTSEDSAVYYCAREKFYGYDYWGQATLTVSSAKTTPPSVYPLAPGSAAQTNSMVTLGCLVKGYFPEPV  
TVTWNSGSLSSGVHTFPAVLQSDLYTLSSSVTVPSSPRPSETVTCNVAHPASSTKVDDKIVPRDCGCKPCICTVPEV  
SSVFIFPPKPKDVLITITLTPKVTCVWVDISKDDPEVQFSWFVDDVEVHTAQTQPREEQFNSTFRSVSELPIMHQDWL  
NGKEFKCRVNSAAFPAPIEKTISKTKGRPKAPQVYTIPPPKEQMAKDKVSLTCMITDFFPEDITVEWQWNGQPAENY  
KNTQPIMNTNGSYFVYSKLVNQKSNWEAGNTFTCSVLHEGLHNHHTKSLSHSPGK

>anti-FLAG-M2\_MS\_LightChain

DVLMTQIPLSLPVSLGDQASISCRSSQSIVHRNGNTYLEWYLLKPGQSPKLLIYKVSNRFSGVPDRFSGSGSGTDFT  
LKISRVEAEDLGVYYCFQGSHPYTFGGGTKLEIRRADAAPTVSIFPPSSEQLTSGGASVVCFLNNFYPKDINVKWK  
IDGSERQNGVLNSWTDQDSKDYSTYSMSSTLTTLTKDEYERHNSYTCEATHKSTSTSPIVKSFNREK

**Table S1.** Coverage statistics for the Herceptin benchmark and anti-FLAG™-M2 MAb sequences.

|                                                |             | Herceptin     | anti-FLAG-M2  |
|------------------------------------------------|-------------|---------------|---------------|
| <b># peptide reads</b><br>(Byonic score >=500) | total       | 4408          | 3371          |
|                                                | stepped HCD | 2686          | 1983          |
|                                                | EThcD       | 1722          | 1388          |
| total                                          |             | 148 [8-394]   | 84 [0-382]    |
| <b>depth-of-coverage</b><br>(median [range])   | CDRH1       | 163 [158-176] | 32 [22-47]    |
|                                                | CDRH2       | 94 [88-103]   | 39 [36-43]    |
|                                                | CDRH3       | 42 [18-67]    | 66 [50-75]    |
|                                                | CDRL1       | 210 [208-218] | 192 [144-207] |
|                                                | CDRL2       | 74 [71-84]    | 46 [40-60]    |
|                                                | CDRL3       | 140 [130-143] | 127 [109-131] |

**Table S2.** Model statistics for Fab crystal structure.

| <b>Refinement statistics</b>                            |                   |                   |
|---------------------------------------------------------|-------------------|-------------------|
| Resolution (Å)                                          | 42.52-1.86        |                   |
| No. of reflections                                      | 39988             |                   |
| <b>PDB</b>                                              | <b>2G60 (old)</b> | <b>7BG1 (new)</b> |
| Total number of atoms                                   | 3518              | 3497              |
| Average atomic displacement parameter (Å <sup>2</sup> ) | 45.0              | 52.0              |
| $R_{\text{work}}/R_{\text{free}}$                       | 0.235/0.278       | 0.217/0.255       |
| Bond length RMSZ                                        | 0.93              | 0.28              |
| Bond angle RMSZ                                         | 0.96              | 0.51              |
| Ramachandran favored/outliers (%)                       | 93.0/1.0          | 97.57/0.24        |
| Molprobit score                                         | 3.37              | 1.60              |
| Clashscore                                              | 56                | 3.61              |

**Table S3.** Comparison of CDR sequences from anti-FLAG™-M2 to other known FLAG™-tag binding MAbs (see refs 36-37).

| <b>Heavy Chain</b> |              |              |               |
|--------------------|--------------|--------------|---------------|
| <b>MAb</b>         | <b>CDRH1</b> | <b>CDRH2</b> | <b>CDRH3</b>  |
| anti-FLAG-M2       | GYSFTTYT---- | LNPSSGYA     | AREKFYGYDY    |
| 2H8                | GFSLNTSGRS-- | IYWDDDK      | ARRMDY        |
| EEh13.6            | GDSLSSFNAGVN | HGAVM-STR    | AKSTGRYDF     |
| EEh14.3            | GDSLSSYNAGVN | HMAGV-STR    | VRNEWSGAF     |
| EEf15.4            | GFSIK--GANVN | HVRGDASTR    | ADRMYSFYSGGEA |

  

| <b>Light Chain</b> |              |              |              |
|--------------------|--------------|--------------|--------------|
| <b>MAb</b>         | <b>CDRL1</b> | <b>CDRL2</b> | <b>CDRL3</b> |
| anti-FLAG-M2       | QSIVHRNGNTY  | KVS          | FQGSHVPYT    |
| 2H8                | QSLVHSNGNTY  | KVS          | SQSTHVPYT    |
| EEh13.6            | QSIVHSNGNTY  | KVS          | FQGS LVPPT   |
| EEh14.3            | QSIVHSNGNTY  | KVS          | FQGS LVPPT   |
| EEf15.4            | NARSGS       | DGN          | SAFDQTNKYVG  |

A) Herceptin

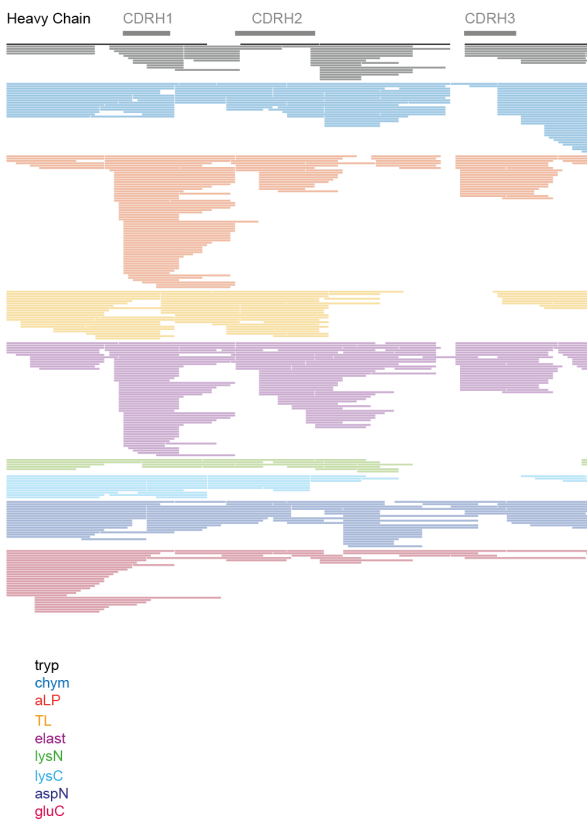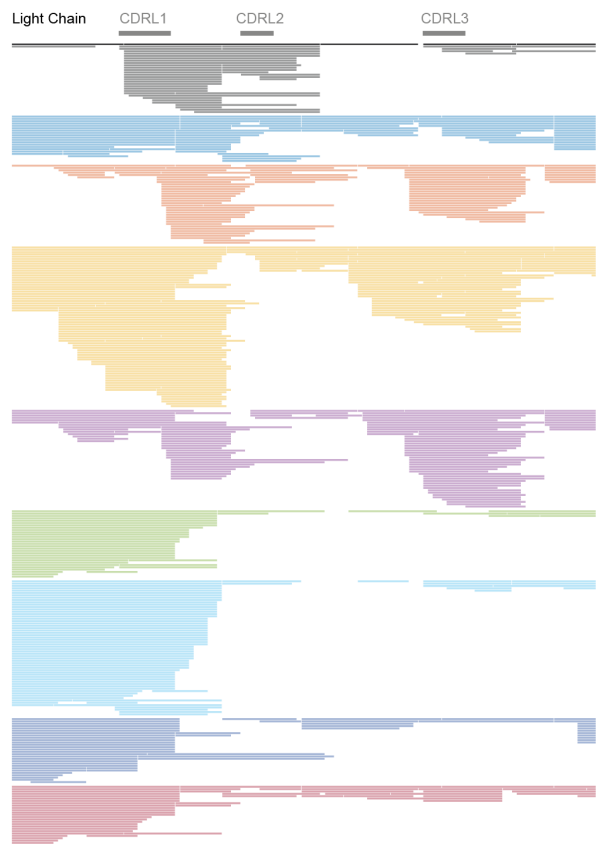

A) anti-FLAG-M2

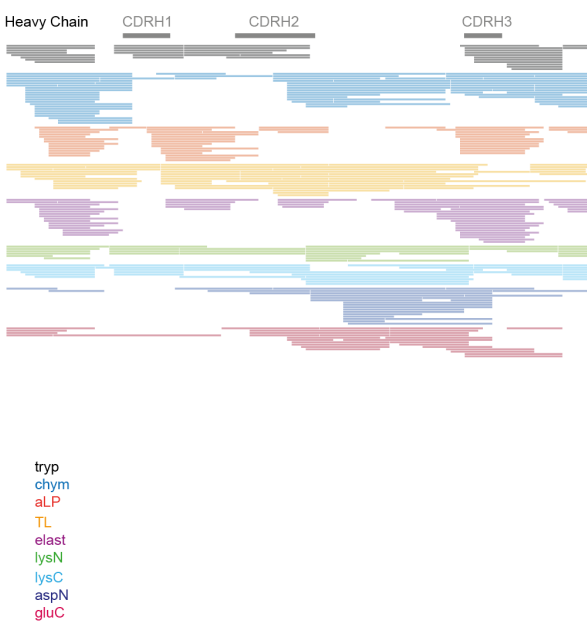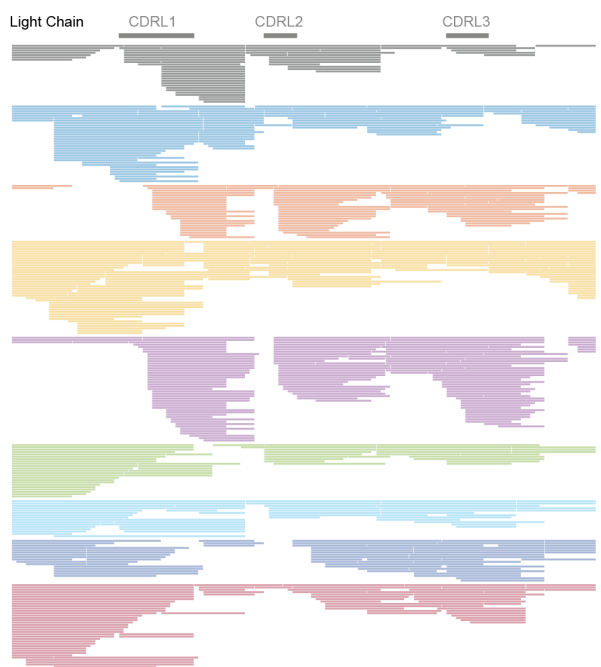

**Figure S1.** Coverage maps of Herceptin benchmark (A) and anti-FLAG™-M2 MAb (B) sequences. Peptides with Byonic scores of  $\geq 500$  are shown.

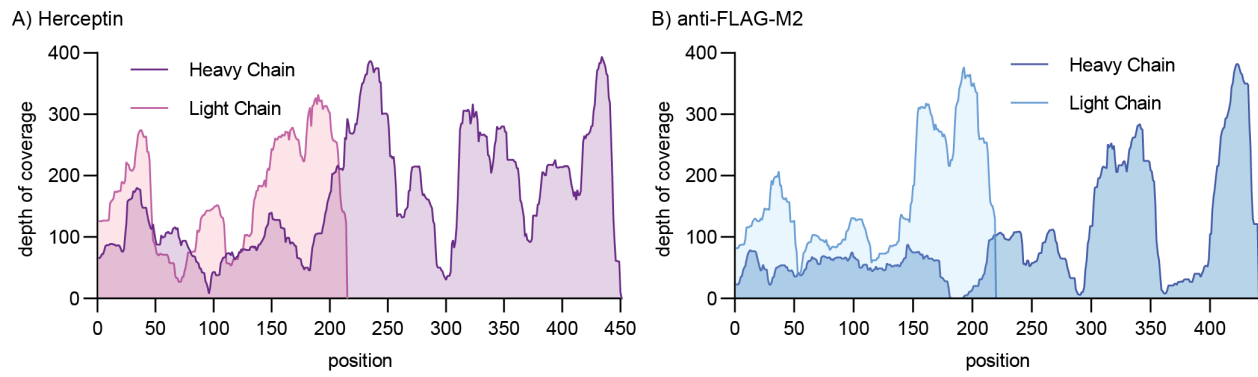

**Figure S2.** Depth of coverage profiles for Herceptin (A) and anti-FLAG™-M2 (B) sequences, based on peptides with Byonic score  $\geq 500$ , as in Figure S1.

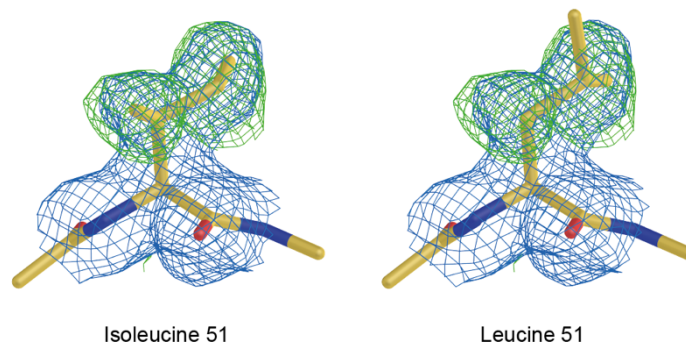

**Figure S3.** Isoleucine/Leucine assignment at Heavy Chain position 51 of anti-FLAG™-M2. (left panel) Electron density around isoleucine 51 at a contour level of 1.0 RMSD in blue and simulated annealing omit map density of the C<sub>γ1</sub>, C<sub>γ2</sub> and C<sub>δ</sub> atoms of this residue at a contour level of 2.5 R.M.S.D. in green. (right panel) A leucine instead of an isoleucine in this location has a poor fit to both maps.



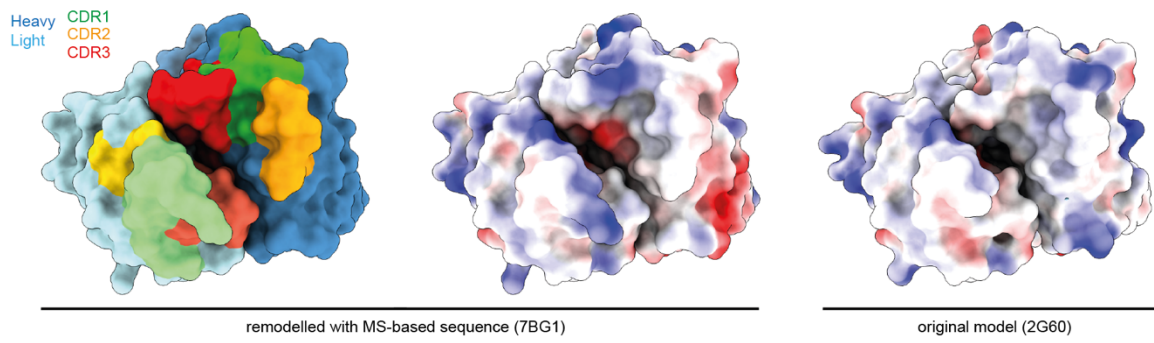

**Figure S4.** Electrostatic surface potential of the anti-FLAG<sup>TM</sup>-M2 paratope. The revised crystal structure based on the MS-derived sequence (PDB ID: 7BG1) is shown alongside the original model (PDB ID: 2G60). The electrostatic surface was calculated with the default *coulombic* command in ChimeraX.

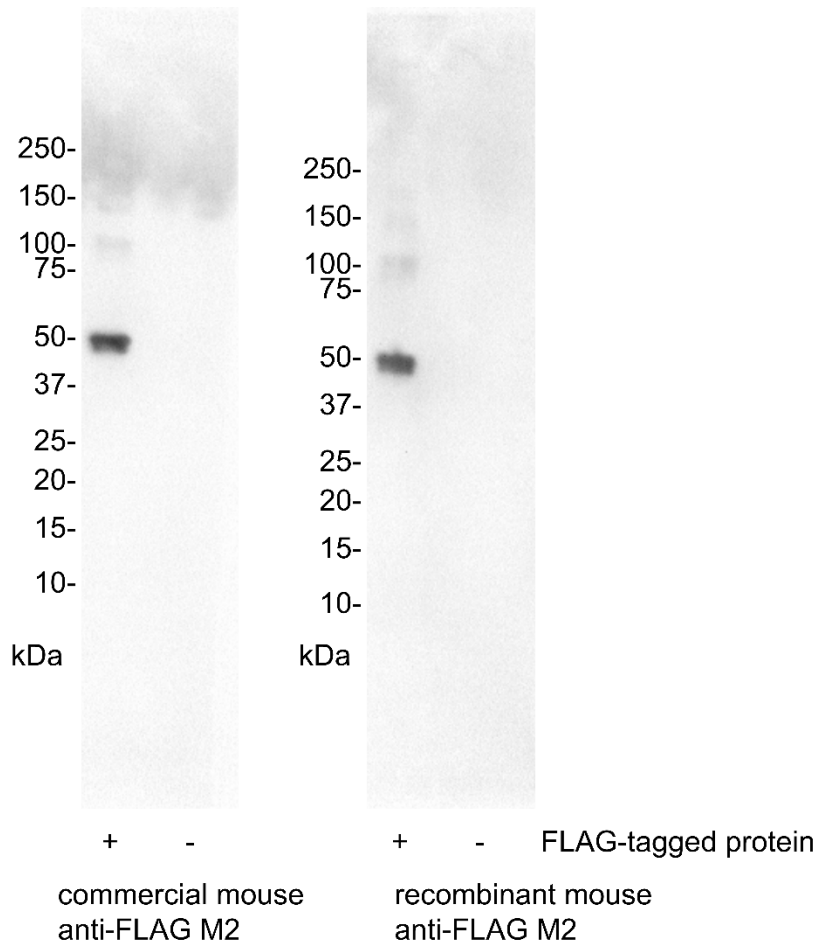

**Figure S5.** Western blot validation of synthetic recombinant anti-FLAG™-M2 compared to the originally sequenced sample. Same Western blot as shown in Figure 3C, showing complete lanes with marker positions.
